# Supplementary material
Source: MDPI journal article supplement (https://www.mdpi.com/2073-4344/13/11/1428)
Supplement: s1 [file s1]

# Supplementary Material

## Efficient hydrogen production from aqueous-phase reforming of biomass-derived oxygenated hydrocarbons over an ultrafine Pt nanocatalyst

Ze Xiao <sup>1</sup>, Xi Lin <sup>1</sup>, Wenhua Feng <sup>1</sup>, Binyi Chen <sup>1</sup>, Qingwei Meng <sup>1,\*</sup> and Tiejun Wang <sup>1,2,\*</sup>

<sup>1</sup> School of Chemical Engineering and Light Industry, Guangdong University of Technology, Guangzhou 510006, China

<sup>2</sup> Graduate School, Guangdong University of Technology, Guangzhou 510006, China

\* Correspondence: qwmeng@gdut.edu.cn (Qingwei Meng), tjwang@gdut.edu.cn (Tiejun Wang)

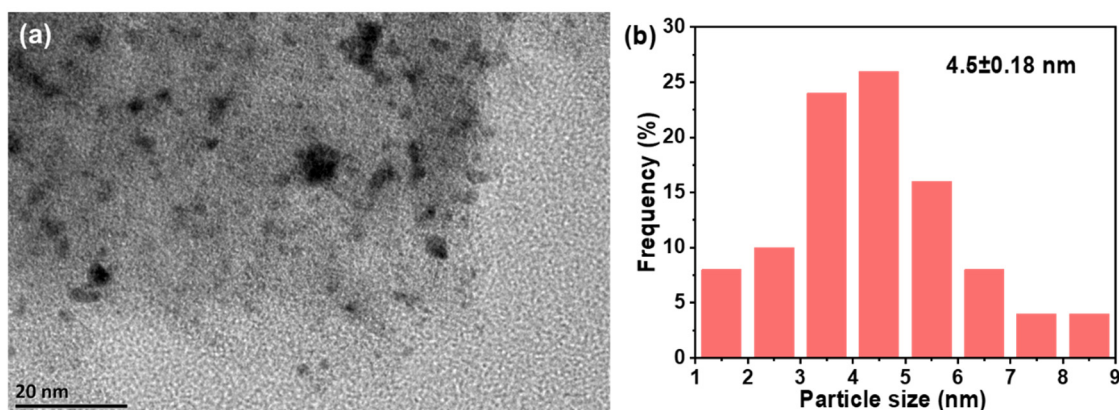

**Figure S1.** (a) TEM image of 20% Pt/C; (b) statistical distribution of Pt particle size of 20% Pt/C.

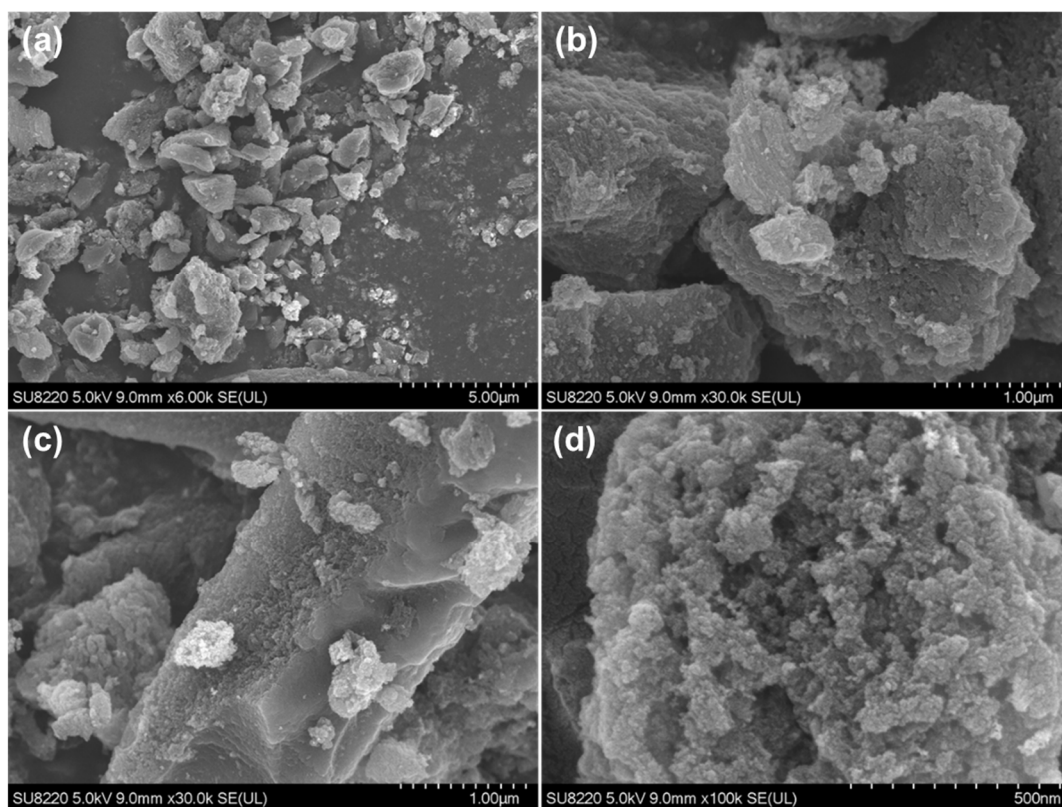

**Figure S2.** SEM images of 20% Pt/C catalyst.

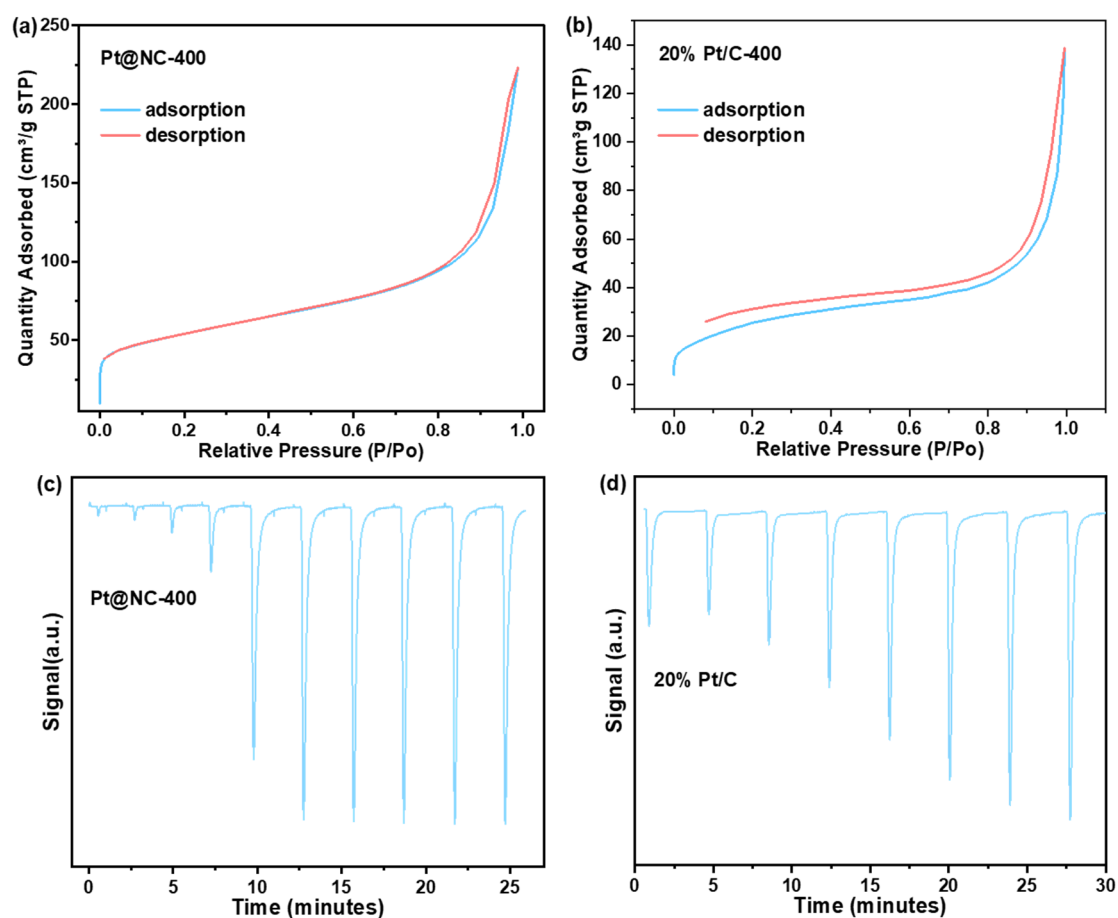

**Figure S3.** N<sub>2</sub> adsorption and desorption curves and the CO pulse chemisorption curves of Pt@NC-400 and 20% Pt/C catalysts.

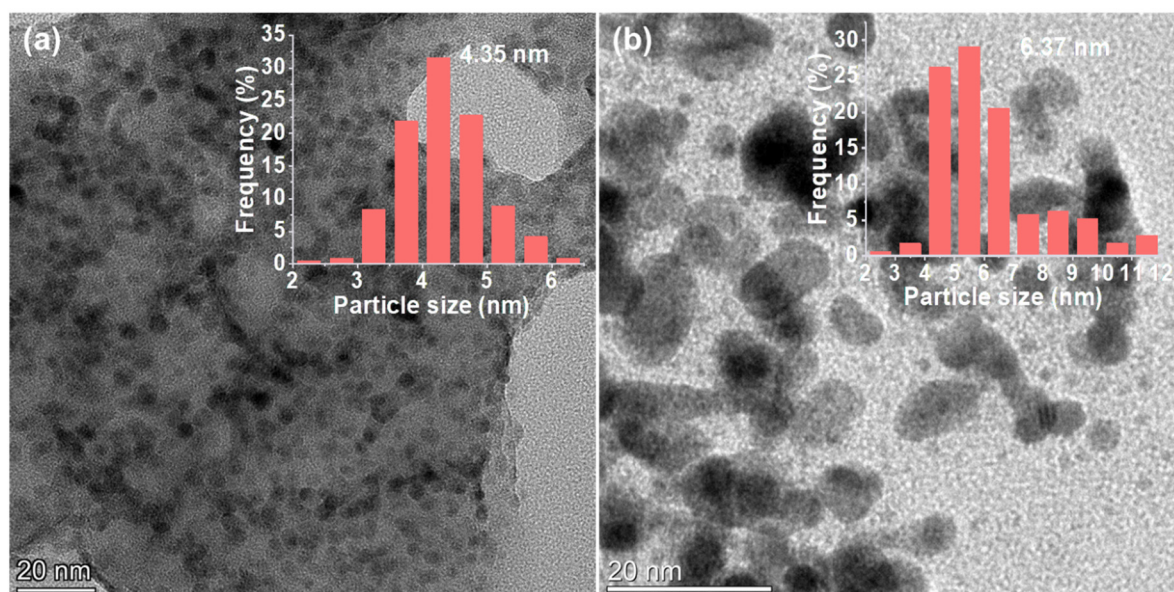

**Figure S4.** TEM images and particle size distributions of the spent Pt@NC-400 (a) and 20% Pt/C (b) catalysts after 8 times of in-situ cycling reaction.

**Table S1.** The particle size of Pt@NC-X catalysts.

| Catalysts | Particle size <sup>a</sup><br>(nm) | Carbonization temperature<br>(°C) |
|-----------|------------------------------------|-----------------------------------|
| Pt@NC-300 | 3.4                                | 300                               |
| Pt@NC-400 | 3.6                                | 400                               |
| Pt@NC-500 | 4.3                                | 500                               |
| Pt@NC-600 | 11.2                               | 600                               |
| Pt@NC-700 | 24.8                               | 700                               |

<sup>a</sup> Pt particle sizes were calculated by Scherrer formula using XRD data.

**Table S2.** Main physiochemical properties of Pt@NC-400 and 20% Pt/C catalysts.

| Samples   | Pt loading <sup>a</sup><br>(wt. %) | S <sub>BET</sub> <sup>b</sup><br>(m <sup>2</sup> g <sup>-1</sup> ) | V <sub>P</sub> <sup>b</sup><br>(cm <sup>3</sup> g <sup>-1</sup> ) | d <sub>p</sub> <sup>b</sup><br>(nm) | Pt metallic<br>surface area <sup>c</sup><br>(m <sup>2</sup> g <sup>-1</sup> ) | Pt disper-<br>sion <sup>c</sup><br>% |
|-----------|------------------------------------|--------------------------------------------------------------------|-------------------------------------------------------------------|-------------------------------------|-------------------------------------------------------------------------------|--------------------------------------|
| Pt@NC-400 | 32.2                               | 135.3                                                              | 0.31                                                              | 14.4                                | 11.6                                                                          | 14.6                                 |
| 20% Pt/C  | 22.9                               | 105.6                                                              | 0.24                                                              | 10.5                                | 6.8                                                                           | 12.0                                 |

<sup>a</sup> Pt loading in the calcined catalysts were examined by inductively coupled plasma optic emission spectrometry (ICP-OES). <sup>b</sup> The BET surface area, pore volume and pore size were obtained from N<sub>2</sub> physisorption. <sup>c</sup> Pt metallic surface area and Pt dispersion of the reduced catalysts were determined by CO chemisorption.

**Table S3.** Relative atomic ratios of the elements C, N, and Pt in the Pt@NC-400 catalyst measured by EDS.

| Z  | Element | Family | Atomic Fraction (%) |
|----|---------|--------|---------------------|
| 6  | C       | K      | 61.0                |
| 7  | N       | K      | 9.2                 |
| 78 | Pt      | L      | 29.8                |

**Table S4.** Data statistics for the Pt 4f spectrum of Pt@NC-400 catalysts. <sup>a</sup>

| Species          | Peak position<br>(eV) | Percentage<br>(%) |
|------------------|-----------------------|-------------------|
| Pt <sup>4+</sup> | 72.8                  | 1.2               |
| Pt <sup>0</sup>  | 71.3                  | 98.8              |

<sup>a</sup> Data in this table was obtained from the XPS experiment.

**Table S5.** APRM performance of Pt-based catalysts at different pyrolysis temperatures.

| Catalyst  | Pyrolysis temperatures (°C) | H <sub>2</sub> production rate ( $\mu\text{mol}_{\text{H}_2}/\text{g}_{\text{cat.}}/\text{s}$ ) | ATOF ( $\text{h}^{-1}$ ) |
|-----------|-----------------------------|-------------------------------------------------------------------------------------------------|--------------------------|
| Pt@NC-300 | 300                         | 391.6                                                                                           | 1639.1                   |
| Pt@NC-400 | 400                         | 1013.4                                                                                          | 4242.1                   |
| Pt@NC-500 | 500                         | 363.5                                                                                           | 1521.4                   |
| Pt@NC-600 | 600                         | 323.6                                                                                           | 1354.7                   |
| Pt@NC-700 | 700                         | 186.0                                                                                           | 778.7                    |

Reaction conditions: 5 mL of methanol solution ( $n(\text{CH}_3\text{OH})/n(\text{H}_2\text{O}) = 1:3$ ), 2 mg of catalyst, 2 MPa of  $\text{N}_2$ , reaction at 210 °C for 1.25 h. The catalysts were reduced in  $\text{H}_2$  at 200 °C for 2 h before reaction.

**Table S6.** Reproducibility test of APRM reaction catalyzed by Pt@NC-400.

| Reaction times                                                                                          | H <sub>2</sub> production rate ( $\mu\text{mol}_{\text{H}_2}/\text{g}_{\text{cat.}}/\text{s}$ ) | Relative deviation (%) |
|---------------------------------------------------------------------------------------------------------|-------------------------------------------------------------------------------------------------|------------------------|
| 1                                                                                                       | 1013.4                                                                                          | 4.0                    |
| 2                                                                                                       | 957.1                                                                                           | -1.8                   |
| 3                                                                                                       | 936.0                                                                                           | -3.9                   |
| 4                                                                                                       | 999.5                                                                                           | 2.6                    |
| 5                                                                                                       | 964.8                                                                                           | -1.0                   |
| Average H <sub>2</sub> production rate ( $\mu\text{mol}_{\text{H}_2}/\text{g}_{\text{cat.}}/\text{s}$ ) | 974.2                                                                                           | -                      |
| Relative average deviation (%)                                                                          | -                                                                                               | 2.7                    |

Relative deviation =  $100\% \cdot (x_i - \bar{x}) / \bar{x}$ , Relative average deviation =  $100\% \cdot |x_i - \bar{x}| / 5$ , where  $x_i$  is the hydrogen production rate for each reaction and  $\bar{x}$  is the average hydrogen production rate. Reaction conditions: 5 mL of methanol solution ( $n(\text{CH}_3\text{OH})/n(\text{H}_2\text{O}) = 1:3$ ), 2 mg of catalyst, 2 MPa of  $\text{N}_2$ , reaction at 210 °C for 1.25 h. The catalyst was reduced in  $\text{H}_2$  at 200 °C for 2 h before reaction.

**Table S7.** APRM performance of Pt@NC-400 and 20% Pt/C catalysts at different reaction temperatures.

| Catalyst  | T (°C) | H <sub>2</sub> production rate ( $\mu\text{mol}_{\text{H}_2}/\text{g}_{\text{cat.}}/\text{s}$ ) | ATOF ( $\text{mol}_{\text{H}_2}/\text{mol}_{\text{Pt}}/\text{h}$ ) | CO selectivity (%) |
|-----------|--------|-------------------------------------------------------------------------------------------------|--------------------------------------------------------------------|--------------------|
| 20% Pt/C  | 170    | 34.8                                                                                            | 266.4                                                              | 40.16              |
|           | 190    | 208.4                                                                                           | 1595.3                                                             | 1.63               |
|           | 210    | 357.3                                                                                           | 2734.9                                                             | 3.20               |
|           | 230    | 634.7                                                                                           | 4792.4                                                             | 0.33               |
|           | 250    | 676.5                                                                                           | 5177.8                                                             | 0.30               |
| Pt@NC-400 | 170    | 240.1                                                                                           | 1256.2                                                             | 10.99              |
|           | 190    | 594.2                                                                                           | 2487.4                                                             | 4.43               |
|           | 210    | 1013.4                                                                                          | 4242.1                                                             | 2.92               |
|           | 230    | 1187.5                                                                                          | 4970.9                                                             | 0.66               |
|           | 250    | 1536.6                                                                                          | 6462.4                                                             | 0.62               |

Reaction conditions: 5 mL of methanol solution ( $n(\text{CH}_3\text{OH})/n(\text{H}_2\text{O}) = 1:3$ ), 2 mg of catalyst, 2 MPa of  $\text{N}_2$ , reaction at 170-250 °C for 1.25 h. The catalysts were reduced in  $\text{H}_2$  at 200 °C for 2 h before reaction.

**Table S8.** Differences in APR catalytic performance between Pt@NC-400 and 20% Pt/C catalysts under different feedstocks.

| Catalysts | H <sub>2</sub> production rate<br>( $\mu\text{mol}_{\text{H}_2}/\text{g}_{\text{cat}}/\text{s}$ ) | ATOF<br>( $\text{mol}_{\text{H}_2}/\text{mol}_{\text{Pt}}/\text{h}$ ) | CO selectivity<br>(%) | Reaction mixture |
|-----------|---------------------------------------------------------------------------------------------------|-----------------------------------------------------------------------|-----------------------|------------------|
| 20%Pt/C   | 357.3                                                                                             | 2734.9                                                                | 3.20                  | Methanol         |
| Pt@NC-400 | 1013.4                                                                                            | 4242.1                                                                | 2.92                  | (1:3)            |
| 20%Pt/C   | 266.0                                                                                             | 2035.8                                                                | 1.52                  | Ethanol          |
| Pt@NC-400 | 779.0                                                                                             | 3260.9                                                                | 1.55                  | (1:3)            |
| 20%Pt/C   | 239.1                                                                                             | 1829.9                                                                | 2.35                  | Propanol         |
| Pt@NC-400 | 546.9                                                                                             | 2289.4                                                                | 0.89                  | (1:5)            |
| 20%Pt/C   | 850.9                                                                                             | 6513.2                                                                | 0.61                  | EG               |
| Pt@NC-400 | 1072.2                                                                                            | 4488.1                                                                | 0.94                  | (1:2)            |
| 20%Pt/C   | 824.0                                                                                             | 6306.8                                                                | 0.34                  | 1,2-PG           |
| Pt@NC-400 | 1766.5                                                                                            | 7394.5                                                                | 0.31                  | (1:4)            |
| 20%Pt/C   | 201.6                                                                                             | 1543.1                                                                | 2.83                  | Sorbitol         |
| Pt@NC-400 | 555.6                                                                                             | 2325.7                                                                | 0.60                  | (1:6)            |

Reaction conditions: 5 mL of alcohol solution, 2 mg of catalyst, 2 MPa of N<sub>2</sub>, reaction at 210 °C for 1.25 h. The catalysts were reduced in H<sub>2</sub> at 200 °C for 2 h before reaction.

**Table S9.** Hydrogen production performance of ARP catalyzed by Pt-based catalysts in recent literature.

| Catalysts                                       | H <sub>2</sub> production rate<br>( $\mu\text{mol}_{\text{H}_2}/\text{g}_{\text{cat}}/\text{s}$ ) | ATOF<br>( $\text{mol}_{\text{H}_2}/\text{mol}_{\text{Pt}}/\text{h}$ ) | CO selectivity<br>(%) | Reaction condition                                           | Reference |
|-------------------------------------------------|---------------------------------------------------------------------------------------------------|-----------------------------------------------------------------------|-----------------------|--------------------------------------------------------------|-----------|
| 2%Pt/ $\alpha$ -MoC                             | 129.6                                                                                             | 4134                                                                  | 0.06                  | 190 °C, nCH <sub>3</sub> OH/nH <sub>2</sub> O = (1:3), batch | 2017[7]   |
| 1% Pt/NiAl <sub>2</sub> O <sub>4</sub>          | 7.3                                                                                               | -                                                                     | 0.05                  | 210 °C, 10 wt% methanol, continuous flow                     | 2019[18]  |
| 2% Pt/Al <sub>2</sub> O <sub>3</sub>            | 30.7                                                                                              | 1077                                                                  | 0.4                   | 240 °C, 10 wt% methanol continuous flow                      | 2021[39]  |
| 1% Pt/ $\gamma$ -Al <sub>2</sub> O <sub>3</sub> | 1.8                                                                                               | -                                                                     | 0.02                  | 210 °C, 10 wt% methanol, continuous flow                     | 2019[18]  |
| 6% Pt/SiO <sub>2</sub>                          | -                                                                                                 | 450000                                                                | undetected            | 210 °C, 10 wt% ethylene glycol, continuous flow              | 2022[40]  |
| 5% Pt/Al <sub>2</sub> O <sub>3</sub>            | 11840.3                                                                                           | -                                                                     | undetected            | 250 °C, 10 wt% glycerol, continuous flow                     | 2019[41]  |
| Pt/LaNiO <sub>x</sub> -2                        | 5.3                                                                                               | -                                                                     | 0.2                   | 210 °C, 10 wt% methanol continuous flow                      | 2022[42]  |
| ZnO/Pt/Al <sub>2</sub> O <sub>3</sub>           | -                                                                                                 | 26.4                                                                  | undetected            | 250 °C<br>5 wt% 1-propanol continuous flow                   | 2016[43]  |
| Pt-Mn/C                                         | -                                                                                                 | 1020                                                                  | undetected            | 225 °C<br>10 wt% glycerol, continuous flow                   | 2017[44]  |

**Table S10.** Catalytic stability performance of Pt@NC-400 and 20% Pt/C catalysts at 210 °C.

| Catalysts | Cycle times | H <sub>2</sub> production rate<br>( $\mu\text{mol}_{\text{H}_2}/\text{g}_{\text{cat}}/\text{s}$ ) | ATOF<br>( $\text{mol}_{\text{H}_2}/\text{mol}_{\text{Pt}}/\text{h}$ ) | CO selectivity (%) |
|-----------|-------------|---------------------------------------------------------------------------------------------------|-----------------------------------------------------------------------|--------------------|
| 20% Pt/C  | 1           | 356.9                                                                                             | 2734.9                                                                | 0.0491             |
|           | 2           | 279.9                                                                                             | 2144.8                                                                | 0.0903             |
|           | 3           | 185.7                                                                                             | 1423.0                                                                | 0.0676             |
|           | 4           | 169.8                                                                                             | 1301.1                                                                | 0.1020             |
|           | 5           | 117.9                                                                                             | 903.5                                                                 | 0.1313             |
|           | 6           | 118.1                                                                                             | 905.0                                                                 | 0.0850             |
|           | 7           | 101.1                                                                                             | 774.7                                                                 | 0.1168             |
|           | 8           | 97.3                                                                                              | 745.6                                                                 | 0.1186             |
| Pt@NC-400 | 1           | 1013.4                                                                                            | 4242.1                                                                | 0.0470             |
|           | 2           | 986.2                                                                                             | 4128.3                                                                | 0.0571             |
|           | 3           | 815.3                                                                                             | 3412.9                                                                | 0.1026             |
|           | 4           | 566.9                                                                                             | 2373.0                                                                | 0.1184             |
|           | 5           | 545.6                                                                                             | 2284.1                                                                | 0.1297             |
|           | 6           | 447.9                                                                                             | 1874.8                                                                | 0.1404             |
|           | 7           | 412.6                                                                                             | 1727.1                                                                | 0.1668             |
|           | 8           | 423.9                                                                                             | 1774.6                                                                | 0.1703             |

Reaction conditions: 5 mL of methanol solution ( $n(\text{CH}_3\text{OH})/n(\text{H}_2\text{O}) = 1:3$ ), 2 mg of catalyst, 2 MPa of N<sub>2</sub>, reaction at 210 °C for 1.25 h. The catalysts were reduced in H<sub>2</sub> at 200 °C for 2 h before reaction.
